# Supplementary material for: Structural alteration of a BYDV-like translation element (BTE) that attenuates p35 expression in three mild Tobacco bushy top virus isolates
Source: PubMed Central journal article supplement (PMC5482831; doi:10.1038/s41598-017-04598-5), 2017-06-23
Supplement: 41598_2017_4598_MOESM1_ESM.pdf [file 41598_2017_4598_MOESM1_ESM.pdf]

# Structural alteration of a BYDV-like translation element (BTE) that attenuates p35 expression in three mild *Tobacco bushy top virus* isolates

Deya Wang<sup>1</sup>, Chengming Yu<sup>1</sup>, Guolu Wang<sup>1</sup>, Shanshan Liu<sup>1</sup>, Kerong Shi<sup>2</sup>, Xiangdong Li<sup>1</sup>, Xuefeng Yuan<sup>1,\*</sup>

(<sup>1</sup>Department of Plant Pathology, College of Plant Protection, Shandong Agricultural University, Tai'an, 271018, P.R.China; <sup>2</sup>College of Animal Science and Veterinary Medicine, Shandong Agricultural University, Tai'an, 271018, P.R.China)

\*Corresponding author, Tel:+86-538-8205608; E-mail address: snowpeak77@163.com (X.Yuan)

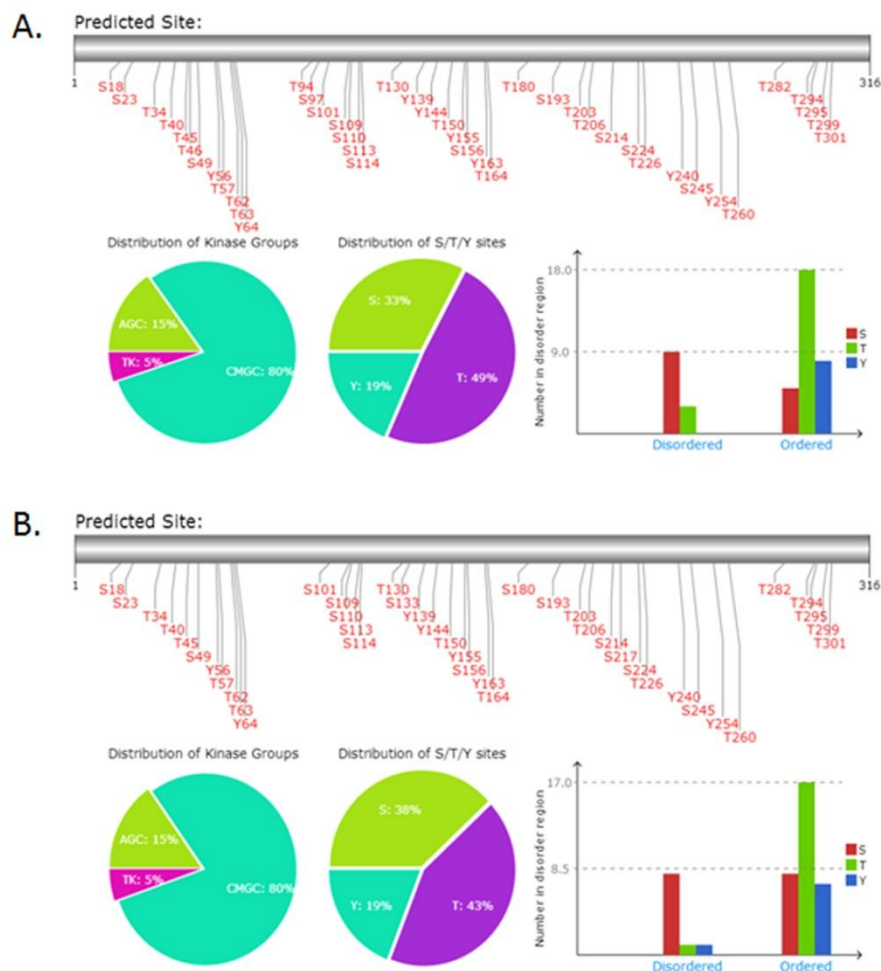

**Supplement Figure 1. Prediction of the phosphorylation sites in p35 of TBTV using GPS 3.0.**

(A) The potential phosphorylation sites in p35 of TB-JC.

(B) The potential phosphorylation sites in p35 of TBTV-Ch.

**SUPPLEMENT TABLE 1 Primers used in this study**

| Primer name        | Sequences (5'→3')                                    | Purpose               |
|--------------------|------------------------------------------------------|-----------------------|
| TB-(1-10)-Fluc-F   | GATCAGATCTAGGTTACGATCCCGGGGAGCTCATGGAAGACGCC         | pF-5U                 |
| TB-(2-5)M- Fluc -F | GATCAGATCTAccaaACGATCCCGGGGAGCTCATGGAAGACGCC         | pF-5Um                |
| Fluc-(1154-1180)-R | GATCCTGGCATGCGAGAATCTGACGCAGGCA                      | pF-5U, pF-5Um         |
| TB-(3508-3529)-F   | GATCAATATTATTGGACACAAAACGGAGCTAG                     | pF-5Um                |
| TB-(4136-4152)-R   | GATCAATATTGGGCGCGAGAGAAAAGTG                         | pF-3U, pF-5U3U        |
| TB-(3800-3803)m-F  | CTTCGGGGGTTtggCCACC                                  | pF-3Um                |
| TB-(3800-3803)m-R  | GGTGGccaaACCCCCGAAG                                  | pF-3Um                |
| TR-2402-F-BgIII    | ACAGATCTATGACTCATTGCCTGCTCCA                         | mutants within BTE    |
| TR-4152-R          | ATGATATCGGGCGCGAGAGAAAAGTCTCATC                      | mutants within BTE    |
| TB-(2-5)M-F        | TACTGCAGTAATACGACTCACTATAGAccaaACGATATGGAGTTCATCAACA | pTB-5Um               |
| TB-(2,5)M2-F       | TACTGCAGTAATACGACTCACTATAGAcGuaACGATATGGAGTTCATCAACA | pTB-5Um1              |
| TB-721-R           | GGGCTACCAGCCACCTGC                                   | pTB-5Um, pTB-5Um1     |
| TB-BTE2m-F         | GGGGGTtACgCCACCCCGCAGCTATCA                          | pTB-3Um1              |
| TB-BTE2m-R         | GGTGGcGTaACCCCCGAAGGGCACC                            | pTB-3Um1              |
| TB-BTE4m-F         | GGGGGTtggCCACCCCGCAGCTATCA                           | pTB-3Um               |
| TB-BTE4m-R         | GGTGGccaaACCCCCGAAGGGCACC                            | pTB-3Um               |
| TB-BTE-M-1-F       | TGGATCCTGcctttCAGGCTGGGATGGTCCC                      | pTB-BTm               |
| TB-BTE-M-1-R       | CTGaaaggCAGGATCCAGTCTCACACC                          | pTB-BTm               |
| TB-BTE-Stem-1-F    | TGTAAGcAttgAGGTGTGAGACTGGATCCT                       | St-m1                 |
| TB-BTE-Stem-1-R    | ACACCTcaaTgCTTACACAGAGGTCTATCAACCA                   | St-m1                 |
| TBBTE-Stem1RM-F    | GCTcaaGGgCGATAAGCCGAGGTGTTGG                         | St-m1-com             |
| TBBTE-Stem1 RM -R  | ATCGcCcttgAGCGTGTGAGGTGATACGT                        | St-m1-com             |
| TB-BTE-Stem-2-F    | GAAACAGGacacAGACTGGATCCTGGGAAAC                      | St-m2                 |
| TB-BTE-Stem-2-R    | AGTCTgtgtCCTGTTTCTTACACAGAGGT                        | St-m2                 |
| TBBTE-Stem2RM-F    | ACCTgtgtCGCTGTTGGCCGATAAGC                           | St-m2-com             |
| TBBTE-Stem2 RM -R  | ACAGCGacacAGGTGATACGTGCGCGG                          | St-m2-com             |
| TBTV-GDD-F         | AACAACcgcgagcaTGCATAGTTATATTTGACAGGCAGTACC           | pTB-GDDm              |
| TBTV-GDD-R         | tgctgcgGTTGTTTCATCAGTTCCTG                           | pTB-GDDm              |
| EF1α-RT-F          | TGGTGCCTCAAGCCTGGTAT                                 | qRT-PCR               |
| EF1α-RT-R          | ACGCTTGAGATCCTTAACCGC                                | qRT--CPR              |
| TB-700-F           | AGAGCAGGTGGCTGGTG                                    | qRT-PCR               |
| TB-970-R           | CGACCACATCCCCTAGCAA                                  | qRT-PCR               |
| TB-1927-F          | GACAGGCAGTACCTGTCCAC                                 | qRT-PCR               |
| TB-2170-R          | CACATTCTCCAATGGCGTTCC                                | qRT-PCR               |
| JC-T7-5'F-PstI     | TACTGCAGTAATACGACTCACTATAGGGGTTACGATATG              | JC,MDI,MDII-RI        |
| TB-2561-R          | GGGACAACGTAATCACT                                    | JC,MDI,MDII-RII       |
| TB-T7-221-F        | TAATACGACTCACTATAGGTAGAAGAGGCTGTGCG                  | JC,MDI,MDII-RII       |
| MDII-MIuI-F        | GCCACGCGTGCTGAGA                                     | JC,MDI,MDII-RII, RIII |
| MDII-MIuI-R        | TCTCAGCACGCGTGCC                                     | MDII-RI               |
| TB-(1503-1522)-F   | GCAGCTGGGTAAGCTTTACC                                 | JC,MDI,MDII-RII, RIII |
| TB-(1503-1522)-R   | GGTAAAGCTTACCCAGCTGC                                 | JC,MDI,MDII-RII,RIII  |
| TB-(3122-3138)-F   | TTCCGATGAGCGGAGGG                                    | JC,MDI,MDII-RIV, RV   |

|                       |                                                                                                             |                             |
|-----------------------|-------------------------------------------------------------------------------------------------------------|-----------------------------|
| TB-(3122-3138)-R      | CCCTCCGCTCATCGGAA                                                                                           | JC,MDI,MDII-RIV, RV         |
| TB-(3867-3885)-F      | CTCTGGAGGTTCCCTCTCC                                                                                         | JC,MDI,MDII-RV, RVI         |
| TB-(3867-3885)-R      | GGAGAGGGAACCTCCAGAG                                                                                         | JC,MDI,MDII-RV, RVI         |
| TB-G3390A-F           | CCTAACCT <b>a</b> ACTCAGGGG                                                                                 | G3390→A                     |
| TB-G3390A-R           | CCCCTGAGT <b>t</b> AGGGTTAGG                                                                                | G3390→A                     |
| TB-G3639A-F           | CCCTTGCA <b>a</b> GGGTGAT                                                                                   | G3639→A                     |
| TB-G3639A-R           | ATCACCT <b>t</b> GCCAAGGG                                                                                   | G3639→A                     |
| TB-T3580C-F           | TGCGA <b>c</b> AACTGAGGTCGTC                                                                                | U3580→C                     |
| TB-T3580C-R           | GACGACCTCAGT <b>t</b> TCGCA                                                                                 | U3580→C                     |
| TB-T3580A-F           | AGTGCGA <b>a</b> AACTGAGGTCGT                                                                               | U3580→A                     |
| TB-T3580A-R           | ACGACCTCAGT <b>t</b> TCGCACT                                                                                | U3580→A                     |
| TB-T3580G-F           | AGTGCGA <b>g</b> AACTGAGGTCGT                                                                               | U3580→G                     |
| TB-T3580G-R           | ACGACCTCAGT <b>c</b> TCGCACT                                                                                | U3580→G                     |
| TB-T7-3X(1-10)-F      | <u>TACTGCAG</u> <i>TAATACGACTCACTATAGGAGGTTACGATAGGTTACGATAGGTTA</i><br>CGATATGGAGTTCATCAACAAGATAAAG        | Triple-5U                   |
| TB-T7-2X(1-10)-F      | <u>TACTGCAG</u> <i>TAATACGACTCACTATAGGAGGTTACGATAGGTTACGATATGGAGT</i><br>TCATCAACAAGATAAAG                  | Double-5U                   |
| TB-T7-2X(1-10)m-F     | <u>TACTGCAG</u> <i>TAATACGACTCACTATAGGAGGTTACGATAcGT<b>a</b>ACGATATG</i>                                    | 5Um1+5U                     |
| TB-T7-3X(1-10)m-in-F  | <u>TACTGCAG</u> <i>TAATACGACTCACTATAGGAGGTTACGATAGGTTACGATAcGT<b>a</b>AC</i><br>GATATGGAGTTCATCAACAAGATAAAG | Tri-5U-m1,<br>Tri-5U-m1-com |
| TB-T7-3X(1-10)m-out-F | <u>TACTGCAG</u> <i>TAATACGACTCACTATAGGAcGT<b>a</b>ACGATAGGTTACGATAGGTTAC</i><br>GATATGGAGTTCATCAACAAGATAAAG | Tri-5U-m2,<br>Tri-5U-m2-com |

Note: T7 promoter: Italic; mutation sites: bold lowercase; enzyme sites: underlined

**SUPPLEMENT TABLE 2 Summary of p35 expression level and ratio of BTE in different TBTV constructs**

| Constructs       | Chimeric region | Donor of chimeric fragment | relative p35 level | Ratio of BTE  |
|------------------|-----------------|----------------------------|--------------------|---------------|
| TBTV-Ch          | N/A             | N/A                        | 100                | 46/50 (92.0%) |
| TB-JC            | N/A             | N/A                        | 25.0 ± 5.0         | 0/49 (0%)     |
| TB-MD-I          | N/A             | N/A                        | 38.3 ± 10.4        | 18/30 (60.0%) |
| TB-MD-II         | N/A             | N/A                        | 20.3 ± 5.0         | 3/43 (7.0%)   |
| Chimeric TBTV-Ch | RI              | TB-JC                      | 17.7 ± 2.5         | 46/50 (92.0%) |
|                  | RII             | TB-JC                      | 94.3 ± 8.1         | 49/50 (98.0%) |
|                  | RIII            | TB-JC                      | 76.3 ± 14.9        | 50/50 (100%)  |
|                  | RIV             | TB-JC                      | 92.5 ± 15.0        | 40/48 (83.3%) |
|                  | RV              | TB-JC                      | 17.8 ± 7.7         | 0/45 (0%)     |
|                  | RVI             | TB-JC                      | 80.0 ± 15.8        | 46/48 (95.8%) |
|                  | RI              | TB-MD-I                    | 14.3 ± 4.4         | 48/50 (96.0%) |
|                  | RII             | TB-MD-I                    | 95.0 ± 5.0         | 48/50 (96.0%) |
|                  | RIII            | TB-MD-I                    | 88.8 ± 8.5         | 47/48 (97.9%) |
|                  | RIV             | TB-MD-I                    | 80.0 ± 14.7        | 43/50 (86.0%) |
|                  | RV              | TB-MD-I                    | 35.0 ± 12.9        | 38/47 (80.9%) |
|                  | RVI             | TB-MD-I                    | 86.3 ± 12.5        | 38/46 (82.6%) |
|                  | RI              | TB-MD-II                   | 20.5 ± 6.7         | 44/50 (88.0%) |
|                  | RII             | TB-MD-II                   | 87.7 ± 6.7         | 48/50 (96.0%) |
|                  | RIII            | TB-MD-II                   | 91.7 ± 2.9         | 33/39 (84.6%) |
|                  | RIV             | TB-MD-II                   | 83.3 ± 12.6        | 45/49 (91.8%) |
|                  | RV              | TB-MD-II                   | 23.8 ± 9.5         | 2/50 (4.0%)   |
|                  | RVI             | TB-MD-II                   | 92.5 ± 6.5         | 33/33 (100%)  |

Note: RI: position 1-511; RII: Position 512-1530; RIII:1531-2402; RIV:2402-3138; RV:3139-3885; RVI:3886-4152. N/A: not analyzed.
